# Supplementary material for: A low-cost hyperspectral scanner for natural imaging and the study of animal colour vision above and under water
Source: PubMed Central journal article supplement (PMC6658669; doi:10.1038/s41598-019-47220-6), 2019-07-25
Supplement: 41598_2019_47220_MOESM5_ESM.pdf [file 41598_2019_47220_MOESM5_ESM.pdf]

# Supplementary information for the manuscript

## A low-cost hyperspectral scanner for natural imaging and the study of animal colour vision above and under water

N. E. Nevala<sup>1</sup> and T. Baden<sup>1,2</sup>

<sup>1</sup>School of Life Sciences, University of Sussex, United Kingdom

<sup>2</sup>Institute of Ophthalmic Research, University of Tübingen, Germany

\$Correspondence at [n.nevala@sussex.ac.uk](mailto:n.nevala@sussex.ac.uk) and [t.baden@sussex.ac.uk](mailto:t.baden@sussex.ac.uk)

### Supplementary Video 1.

A video demonstrating the mirror movements and how light is guided to the spectrometer through them.

### Supplementary Videos 2-4.

Hyperspectral reconstructions of the three scanned scenes presented in this work, with each frame corresponding to a 1 nm instance. Videos 2 and 3 in addition depict reconstructions of combined red, green and blue (RGB) channels for human spectral sensitivity of the scanned scene next to the videos. Video 4 instead depicts a combined zebrafish RGB reconstruction of the scene.
